# Supplementary material
Source: HighWire-hosted journal article supplement (https://bmjopen.bmj.com/content/14/8/e089939)
Supplement: inline-supplementary-material-2 [file inline-supplementary-material-2.pdf]

### Supplementary Table 2. Data Charting Template

[illegible]
